# Supplementary material for: Histidine-based coordinative polymers for efficient intracellular protein delivery via enhanced protein binding, cellular uptake, and endosomal escape
Source: Royal Society of Chemistry journal article supplement (doi:10.1039/d2bm01541b), 2022-12-23
Supplement: d2bm01541b2.pdf [file d2bm01541b2.pdf]

## Histidine-based coordinative polymers for efficient intracellular protein delivery via enhanced protein binding, cellular uptake, and endosomal escape

Changyuan Chen,<sup>a</sup> Peng Gao,<sup>a</sup> Hui Wang,<sup>a</sup> Yiyun Cheng,<sup>\*b</sup> and Jia Lv<sup>\*b</sup>

<sup>a</sup>South China Advanced Institute for Soft Matter Science and Technology, School of Molecular Science and Engineering, South China University of Technology, Guangzhou, 510640, China.

<sup>b</sup>Shanghai Frontiers Science Center of Genome Editing and Cell Therapy, Shanghai Key Laboratory of Regulatory Biology, School of Life Sciences, East China Normal University, Shanghai, 200241, China.

\*Corresponding author. Email: yycheng@mail.ustc.edu.cn; jlv@bio.ecnu.edu.cn.

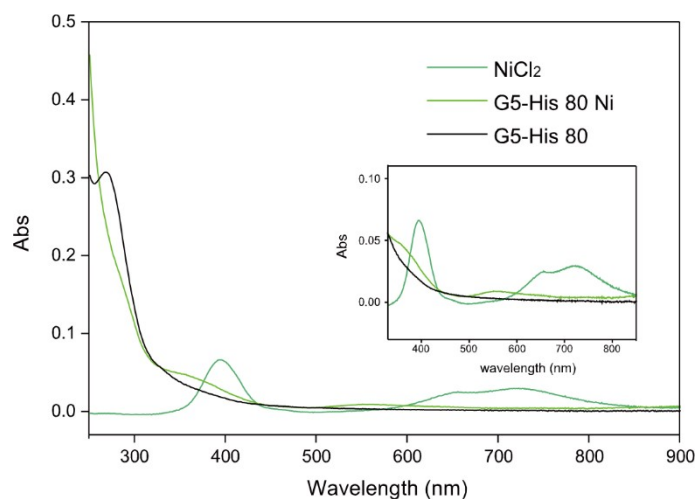

**Fig. S1** UV-Vis spectra of NiCl<sub>2</sub>, G5-His 80 Ni, and G5-His 80 in aqueous solution.

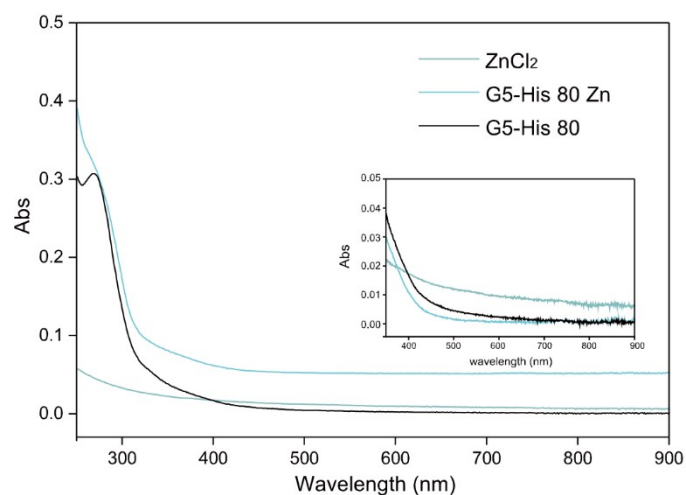

**Fig. S2** UV-Vis spectra of  $\text{ZnCl}_2$ , G5-His 80 Zn, and G5-His 80 in aqueous solution.

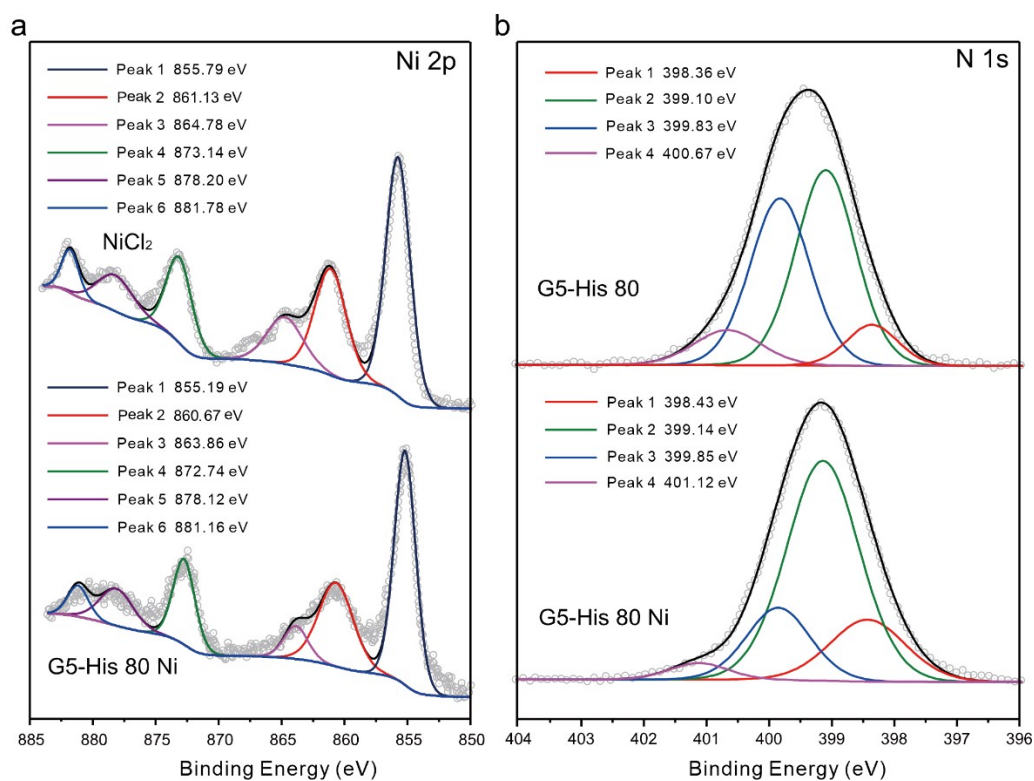

**Fig. S3** (a) Magnified XPS Ni 2p spectra of  $\text{NiCl}_2$  and G5-His 80 Ni. (b) Magnified XPS N 1s spectra of G5-His 80 and G5-His 80 Ni.

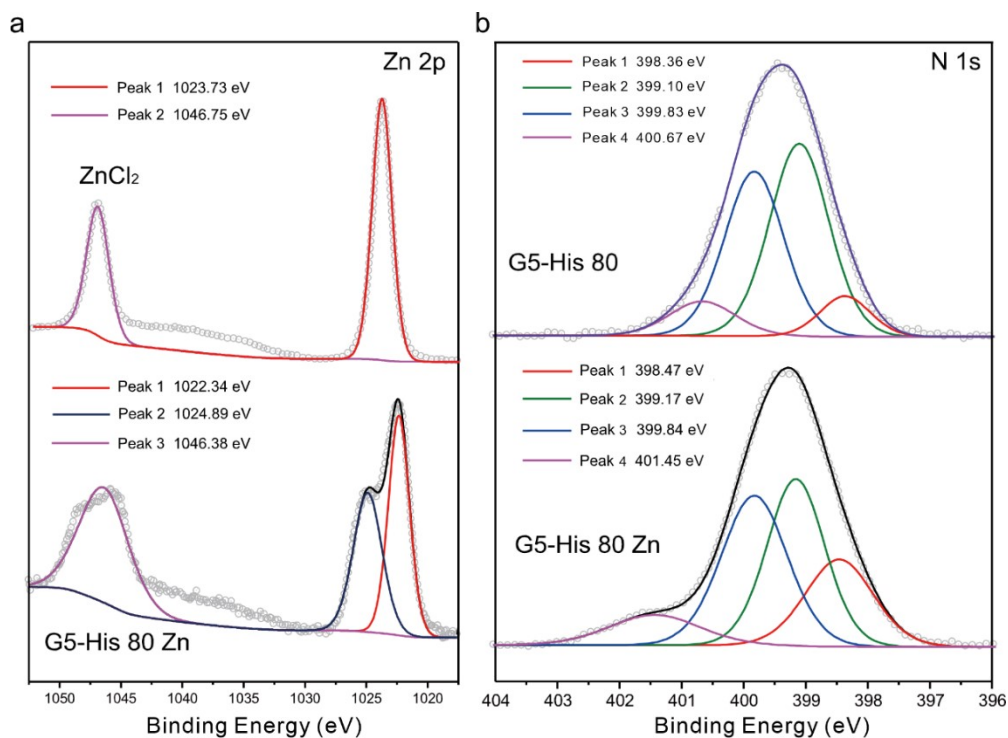

**Fig. S4** (a) Magnified XPS Zn 2p spectra of ZnCl<sub>2</sub> and G5-His 80 Zn. (b) Magnified XPS N 1s spectra of G5-His 80 and G5-His 80 Zn.

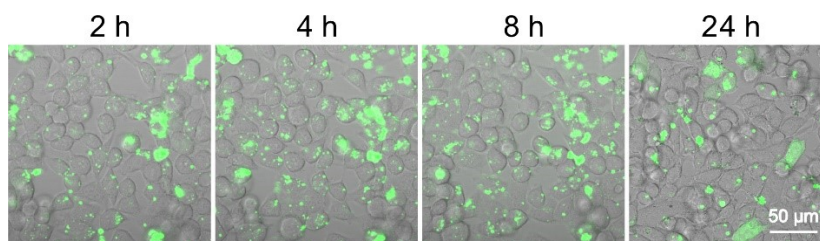

**Fig. S5** Fluorescence images of HeLa cells treated with G5-His 80 Ni/EGFP for 2 h, 4 h, 8 h, and 24 h. The concentrations of G5-His 80 Ni and EGFP were 40 μg/mL and 25 μg/mL, respectively.

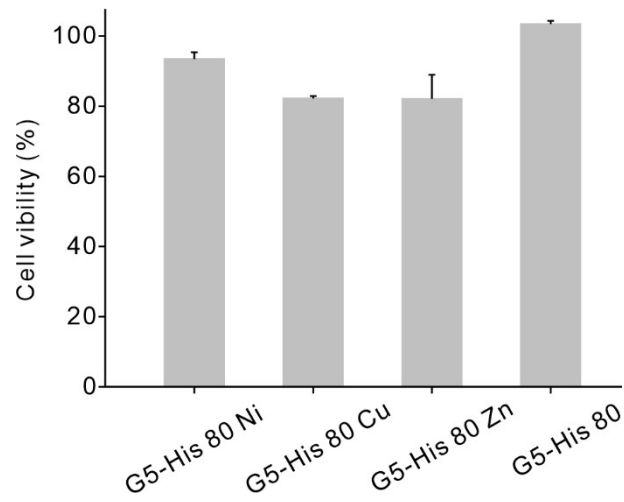

**Fig. S6** Viability of HeLa cells treated with the polymers for 24 h. The concentration of the polymers was 40  $\mu\text{g}/\text{mL}$ .

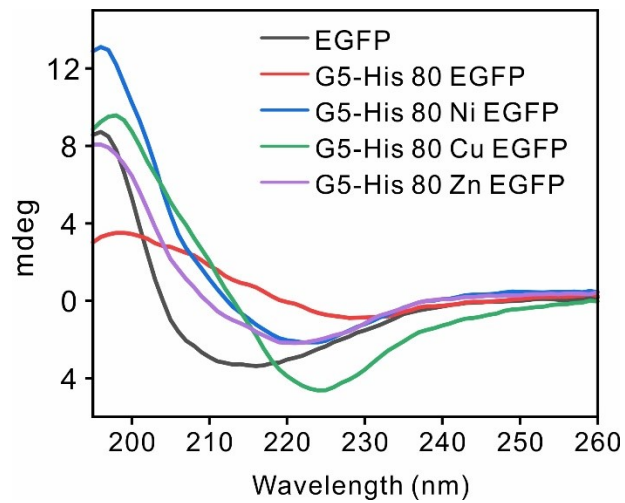

**Fig. S7** Circular dichroism spectra of EGFP and polymer/EGFP complexes. The weight ratio of the polymers to EGFP was 1.6:1.

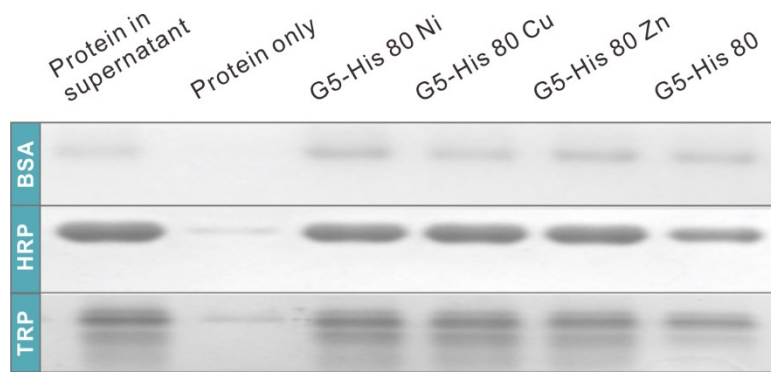

**Fig. S8** Sodium dodecyl sulfate-polyacrylamide gel electrophoresis analysis of the polymer/bovine serum albumin (BSA), polymer/Horseradish peroxidase (HRP), and polymer/Trypsin (Trp) complexes. The weight ratio of the polymers to protein was 1.6:1.

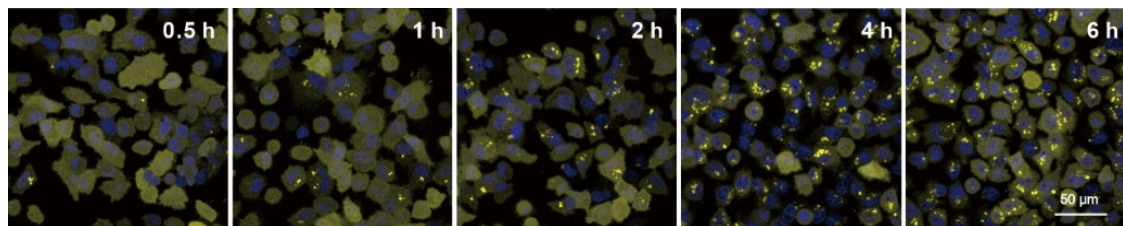

**Fig. S9** Fluorescence images of Gal8-YFP HeLa cells treated with the G5-His 80 Cu/BSA complexes for 0.5 h, 1 h, 2 h, 4 h, and 6 h, respectively.

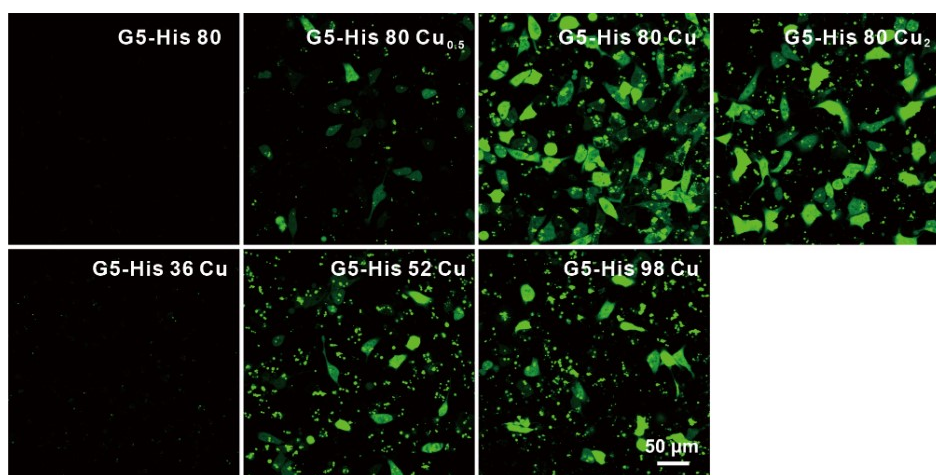

**Fig. S10** Fluorescence images of HeLa cells treated with the G5-His 80/EGFP, G5-His 80 Cu<sub>0.5</sub>/EGFP, G5-His 80 Cu/EGFP, G5-His 80 Cu<sub>2</sub>/EGFP, G5-His 36 Cu/EGFP, G5-His 52 Cu/EGFP, and G5-His 98 Cu/EGFP complexes for 6 h, respectively. The concentrations of G5-His 36 Cu, G5-His 52 Cu, G5-His 80, G5-His 80 Cu, G5-His 80 Cu<sub>0.5</sub> was 40 μg/mL. The concentration of G5-His 80 Cu<sub>2</sub>, G5-His 98 Cu, and EGFP were 20 μg/mL, 30 μg/mL, and 25 μg/mL, respectively.

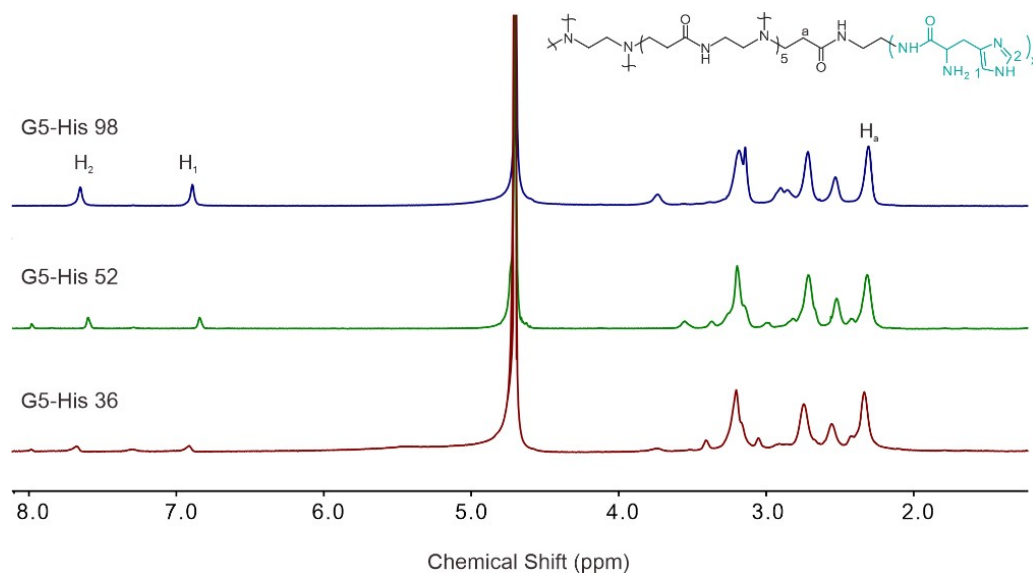

**Fig. S11** <sup>1</sup>H NMR spectra of G5-His 98, G5-His 52, and G5-His 36 in D<sub>2</sub>O.
